# Supplementary material for: Nuclear FOXP3 inhibits tumor growth and induced apoptosis in hepatocellular carcinoma by targeting c-Myc
Source: PubMed Central journal article supplement (PMC7595121; doi:10.1038/s41389-020-00283-x), 2020-10-28
Supplement: 41389_2020_283_MOESM1_ESM.pdf [file 41389_2020_283_MOESM1_ESM.pdf]

Table S1. Correlation between FOXP3 and FOXP3Δ3 expression and clinicopathologic characteristics

|                       | FOXP3 Staining |            | P      | FOXP3Δ3 staining |            | P     |
|-----------------------|----------------|------------|--------|------------------|------------|-------|
|                       | Low(n=66)      | High(n=18) |        | Low (n=63)       | High(n=21) |       |
| Gender                |                |            |        |                  |            |       |
| Female                | 10             | 4          | 0.487  | 13               | 1          | 0.173 |
| Male                  | 56             | 14         |        | 50               | 20         |       |
| Age (years)           |                |            |        |                  |            |       |
| ≤50                   | 27             | 7          | 0.877  | 25               | 9          | 0.797 |
| >50                   | 39             | 11         |        | 38               | 12         |       |
| Serum AFP (ng/ml)     |                |            |        |                  |            |       |
| NA                    | 31             | 6          | 0.531  | 23               | 14         | 0.055 |
| ≤20                   | 11             | 3          |        | 12               | 2          |       |
| >20                   | 24             | 9          |        | 28               | 5          |       |
| Tumor number          |                |            |        |                  |            |       |
| Single                | 34             | 15         | 0.015* | 41               | 10         | 0.156 |
| Multiple              | 32             | 3          |        | 22               | 11         |       |
| Tumor Size (cm)       |                |            |        |                  |            |       |
| ≤5                    | 43             | 15         | 0.139  | 47               | 11         | 0.056 |
| >5                    | 23             | 3          |        | 16               | 10         |       |
| Vascular invasion     |                |            |        |                  |            |       |
| No                    | 53             | 16         | 0.507  | 54               | 15         | 0.188 |
| Yes                   | 13             | 2          |        | 9                | 6          |       |
| Liver cirrhosis       |                |            |        |                  |            |       |
| No                    | 27             | 6          | 0.56   | 21               | 12         | 0.053 |
| Yes                   | 39             | 12         |        | 42               | 9          |       |
| HBsAg                 |                |            |        |                  |            |       |
| NA                    | 8              | 1          | 0.552  | 6                | 3          | 0.605 |
| Negative              | 7              | 1          |        | 7                | 1          |       |
| Positive              | 51             | 16         |        | 50               | 17         |       |
| TNM stage             |                |            |        |                  |            |       |
| I                     | 34             | 14         | 0.04*  | 40               | 10         | 0.199 |
| II/III                | 32             | 4          |        | 23               | 11         |       |
| Tumor differentiation |                |            |        |                  |            |       |
| NA                    | 13             | 2          | 0.701  | 12               | 3          | 0.46  |
| Well/moderate         | 43             | 13         |        | 43               | 13         |       |
| Poor                  | 10             | 3          |        | 8                | 5          |       |

Table S2. Cox proportional Hazard regression analysis of patients' overall survival

| Variables                                      | Univariable |       |       |        | Multivariable |       |        |        |
|------------------------------------------------|-------------|-------|-------|--------|---------------|-------|--------|--------|
|                                                | HR          | 95%CI |       | P      | HR            | 95%CI |        | P      |
|                                                |             | Lower | Upper |        |               | Lower | Upper  |        |
| Gender<br>(male vs female)                     | 1.629       | 0.8   | 3.318 | 0.178  | 1.286         | 0.603 | 2.743  | 0.514  |
| Age (years)<br>>50 vs ≤50                      | 2.087       | 1.19  | 3.66  | 0.01*  | 1.889         | 1.013 | 3.525  | 0.046* |
| AFP(ng/ml)<br>>20 vs ≤20                       | 0.531       | 0.294 | 0.958 | 0.036* | 0.842         | 0.61  | 1.162  | 0.294  |
| Number of tumor<br>multiple vs single          | 1.304       | 0.776 | 2.191 | 0.316  | 4.065         | 0.413 | 40.008 | 0.229  |
| Tumor size(cm)<br>>5 vs ≤5                     | 1.151       | 0.666 | 1.989 | 0.613  | 1.095         | 0.57  | 2.102  | 0.786  |
| Vascular invasion<br>Yes vs No                 | 1.759       | 0.903 | 3.427 | 0.097  | 2.582         | 1.069 | 6.238  | 0.035* |
| Liver cirrhosis<br>Yes vs No                   | 1.735       | 1.017 | 2.961 | 0.043* | 1.87          | 1.018 | 3.437  | 0.044* |
| HBsAg<br>Positive vs Negative                  | 1.416       | 0.425 | 4.717 | 0.571  | 1.396         | 0.857 | 2.724  | 0.18   |
| TMNstahge<br>II/III vs I                       | 1.149       | 0.684 | 1.929 | 0.599  | 0.22          | 0.021 | 2.35   | 0.21   |
| Tumor differentiation<br>Poor vs well/moderate | 0.945       | 0.342 | 2.611 | 0.913  | 1.047         | 0.628 | 1.743  | 0.861  |
| FOXP3 expression<br>High vs Low                | 0.441       | 0.228 | 0.853 | 0.015* | 0.43          | 0.211 | 0.875  | 0.02*  |

Table S3. Cox proportional Hazard regression analysis of patients' recurrence-free survival

| Variables                                      | Univariable |       |       |        | Multivariable |       |        |        |
|------------------------------------------------|-------------|-------|-------|--------|---------------|-------|--------|--------|
|                                                | HR          | 95%CI |       | P      | HR            | 95%CI |        | P      |
|                                                |             | Lower | Upper |        |               | Lower | Upper  |        |
| Gender<br>(male vs female)                     | 1.712       | 0.84  | 3.487 | 0.139  | 1.348         | 0.64  | 2.841  | 0.432  |
| Age (years)<br>>50 vs ≤50                      | 1.958       | 1.113 | 3.446 | 1.958  | 1.826         | 0.978 | 3.41   | 0.059  |
| AFP(ng/ml)<br>>20 vs ≤ 20                      | 0.488       | 0.27  | 0.883 | 0.018* | 0.752         | 0.545 | 1.038  | 0.83   |
| Number of tumor<br>multiple vs single          | 1.237       | 0.737 | 2.077 | 0.42   | 2.587         | 0.158 | 42.257 | 0.505  |
| Tumor size(cm)<br>>5 vs ≤ 5                    | 1.196       | 0.692 | 2.067 | 0.521  | 0.921         | 0.488 | 1.739  | 0.8    |
| Vascular invasion<br>Yes vs No                 | 2.131       | 1.065 | 4.262 | 0.032* | 2.517         | 1.038 | 6.106  | 0.41   |
| Liver cirrhosis<br>Yes vs No                   | 1.667       | 0.978 | 2.844 | 0.061  | 1.622         | 0.893 | 2.947  | 0.112  |
| HBsAg<br>Positive vs Negative                  | 1.399       | 0.556 | 3.52  | 0.475  | 1.202         | 0.739 | 1.954  | 0.459  |
| TMNstahge<br>II/III vs I                       | 1.18        | 0.703 | 1.982 | 0.531  | 0.321         | 0.018 | 5.607  | 0.436  |
| Tumor differentiation<br>Poor vs well/moderate | 1.802       | 0.848 | 3.83  | 0.126  | 1.223         | 0.745 | 2.01   | 0.426  |
| FOXP3 expression<br>High vs Low                | 0.477       | 0.247 | 0.922 | 0.028* | 0.459         | 0.228 | 0.925  | 0.029* |

Table S4. Cox proportional Hazard regression analysis of patients' overall survival

| Variables                                      | Univariable |       |       |        | Multivariable |       |        |        |
|------------------------------------------------|-------------|-------|-------|--------|---------------|-------|--------|--------|
|                                                | HR          | 95%CI |       | P      | HR            | 95%CI |        | P      |
|                                                |             | Lower | Upper |        |               | Lower | Upper  |        |
| Gender<br>(male vs female)                     | 1.629       | 0.8   | 3.318 | 0.178  | 1.404         | 0.657 | 2.999  | 0.381  |
| Age (years)<br>>50 vs ≤50                      | 2.087       | 1.19  | 3.66  | 0.01*  | 1.886         | 1.019 | 3.492  | 0.043* |
| AFP(ng/ml)<br>>20 vs ≤20                       | 0.531       | 0.294 | 0.958 | 0.036* | 0.825         | 0.593 | 1.146  | 0.25   |
| Number of tumor<br>multiple vs single          | 1.304       | 0.776 | 2.191 | 0.316  | 5.62          | 0.597 | 52.869 | 0.131  |
| Tumor size(cm)<br>>5 vs ≤5                     | 1.151       | 0.666 | 1.989 | 0.613  | 1.239         | 0.635 | 2.418  | 0.529  |
| Vascular invasion<br>Yes vs No                 | 1.759       | 0.903 | 3.427 | 0.097  | 2.75          | 1.083 | 6.985  | 0.033* |
| Liver cirrhosis<br>Yes vs No                   | 1.735       | 1.017 | 2.961 | 0.043* | 1.842         | 0.981 | 3.457  | 0.057  |
| HBsAg<br>Positive vs Negative                  | 1.416       | 0.425 | 4.717 | 0.571  | 1.348         | 0.832 | 2.186  | 0.225  |
| TMNstahge<br>II/III vs I                       | 1.149       | 0.684 | 1.929 | 0.599  | 0.147         | 0.014 | 1.533  | 0.109  |
| Tumor differentiation<br>Poor vs well/moderate | 0.945       | 0.342 | 2.611 | 0.913  | 1.075         | 0.64  | 1.808  | 0.784  |
| FOXP3Δ3 expression<br>High vs Low              | 1.314       | 0.731 | 2.361 | 0.362  | 1.312         | 0.678 | 2.54   | 0.42   |

Table S5. Cox proportional Hazard regression analysis of patients' recurrence-free survival

| Variables                                      | Univariable |       |       |        | Multivariable |       |        |        |
|------------------------------------------------|-------------|-------|-------|--------|---------------|-------|--------|--------|
|                                                | HR          | 95%CI |       | P      | HR            | 95%CI |        | P      |
|                                                |             | Lower | Upper |        |               | Lower | Upper  |        |
| Gender<br>(male vs female)                     | 1.712       | 0.84  | 3.487 | 0.139  | 1.351         | 0.637 | 2.865  | 0.433  |
| Age (years)<br>>50 vs ≤50                      | 1.958       | 1.113 | 3.446 | 1.958  | 1.817         | 0.985 | 3.352  | 0.056  |
| AFP(ng/ml)<br>>20 vs ≤20                       | 0.488       | 0.27  | 0.883 | 0.018* | 0.74          | 0.532 | 1.028  | 0.072  |
| Number of tumor<br>multiple vs single          | 1.237       | 0.737 | 2.077 | 0.42   | 3.228         | 0.189 | 55.237 | 0.419  |
| Tumor size(cm)<br>>5 vs ≤5                     | 1.196       | 0.692 | 2.067 | 0.521  | 1.052         | 0.553 | 2.002  | 0.877  |
| Vascular invasion<br>Yes vs No                 | 2.131       | 1.065 | 4.262 | 0.032* | 2.768         | 1.086 | 7.054  | 0.033* |
| Liver cirrhosis<br>Yes vs No                   | 1.667       | 0.978 | 2.844 | 0.061  | 1.669         | 0.903 | 3.087  | 0.102  |
| HBsAg<br>Positive vs Negative                  | 1.399       | 0.556 | 3.52  | 0.475  | 1.129         | 0.698 | 1.842  | 0.621  |
| TMNstahge<br>II/III vs I                       | 1.18        | 0.703 | 1.982 | 0.531  | 0.238         | 0.013 | 4.422  | 0.336  |
| Tumor differentiation<br>Poor vs well/moderate | 1.802       | 0.848 | 3.83  | 0.126  | 1.259         | 0.762 | 2.028  | 0.369  |
| FOXP3Δ3 expression<br>High vs Low              | 1.289       | 0.718 | 2.316 | 0.396  | 1.212         | 0.632 | 2.322  | 0.563  |

Table S6. Primers used in this study

| Primers              | Sequence(5'-3')       | Application       |
|----------------------|-----------------------|-------------------|
| FOXP3-1 For          | AGTTTCCCACAAGCCAGGCT  | Nested PCR Round1 |
| FOXP3-1 Rev          | TGGGGAGCTCGGCTGCAGTT  | Nested PCR Round1 |
| FOXP3-2 For          | TGCCTCCTCTTCTTCCTTGA  | Nested PCR Round2 |
| FOXP3-2 Rev          | ATTTGGGAAGGTGCAGAGC   | Nested PCR Round2 |
| FOXP3-3 For          | CTGCCAGGCGGACCATC     | Nested PCR Round2 |
| FOXP3-3 Rev          | GAATGTGCTGTTTCCATGGCT | Nested PCR Round2 |
| FOXP3-4 For          | GGCACTCCTCCAGGACAG    | Real-time PCR     |
| FOXP3-4 Rev          | GCTGATCATGGCTGGGCTCT  | Real-time PCR     |
| FOXP3 $\Delta$ 3 For | CAGCTGCAGCTCTCAACGGTG | Real-time PCR     |
| FOXP3 $\Delta$ 3 Rev | TGAGGAAGTCCTCTGGCTCT  | Real-time PCR     |
| ACTIN-For            | AGGATGCAGAAGGAGATCAC  | Real-time PCR     |
| ACTIN-Rev            | TGTAACGCAACTAAGTCATAG | Real-time PCR     |
| Chip-For             | AGTACTGCTACGGAGGAGCA  | Chip assay        |
| Chip-Rev             | GCGGAGATTAGCGAGAGAGG  | Chip assay        |
